# Supplementary material for: Tiling Photonic Topological Insulator for Laser Applications
Source: MDPI journal article supplement (doi:10.3390/app13064004), 2023-03-21
Supplement: s1 [file s1]

Archive with 1 entries (1 files):
- applsci-2269371-supplementary.pdf
